# Supplementary material for: Bcl-2 dependent modulation of Hippo pathway in cancer cells
Source: PubMed Central journal article supplement (PMC11097437; doi:10.1186/s12964-024-01647-1), 2024-05-16

# Supplementary Figure S1

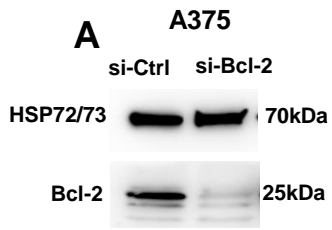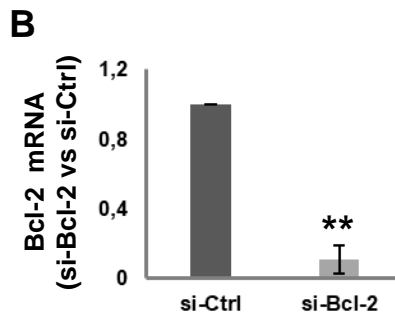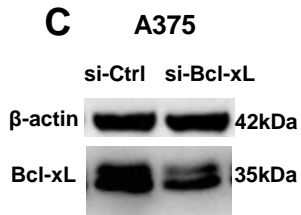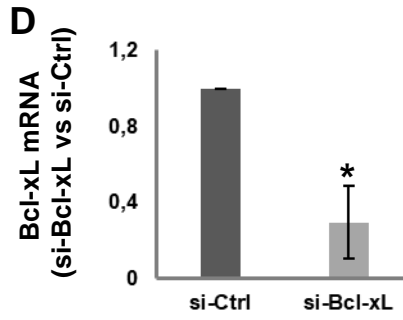

# Supplementary Figure S2

## A

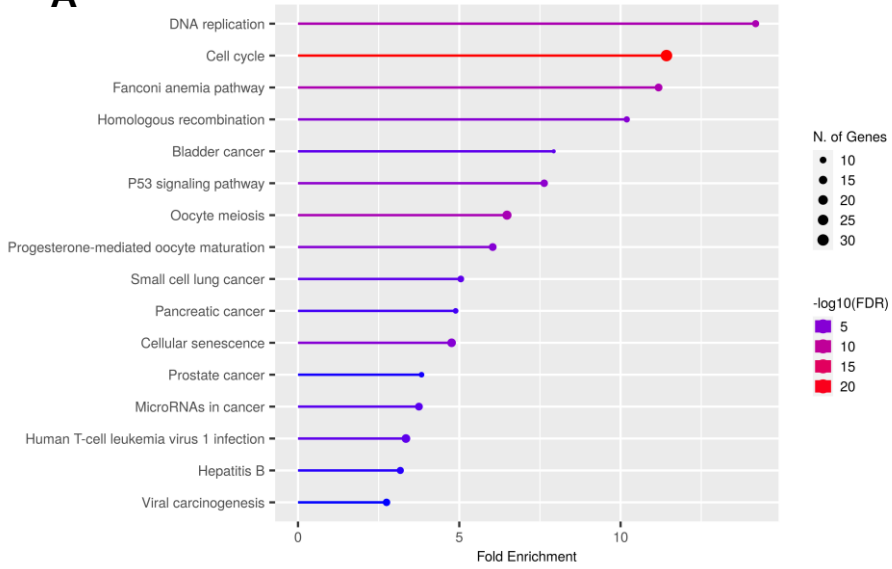

## B

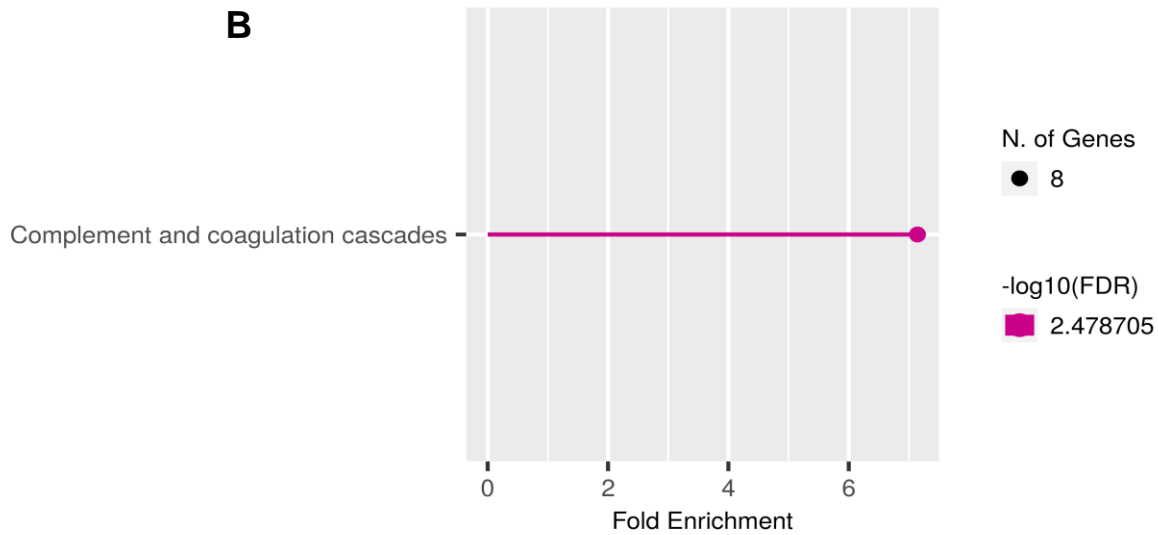

# Supplementary Figure S3

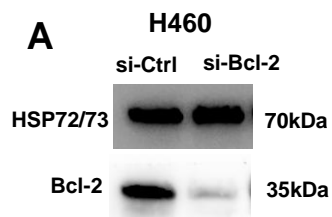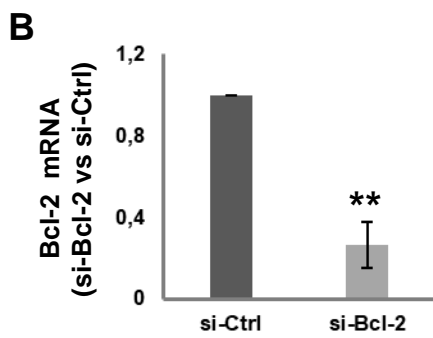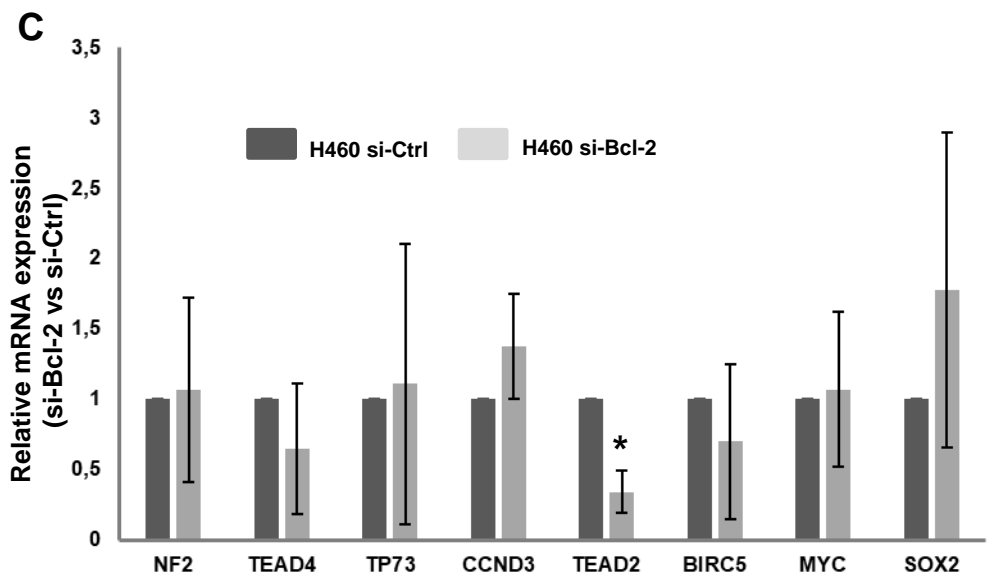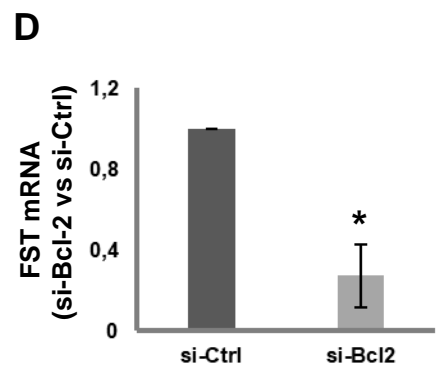

# Supplementary Figure S4

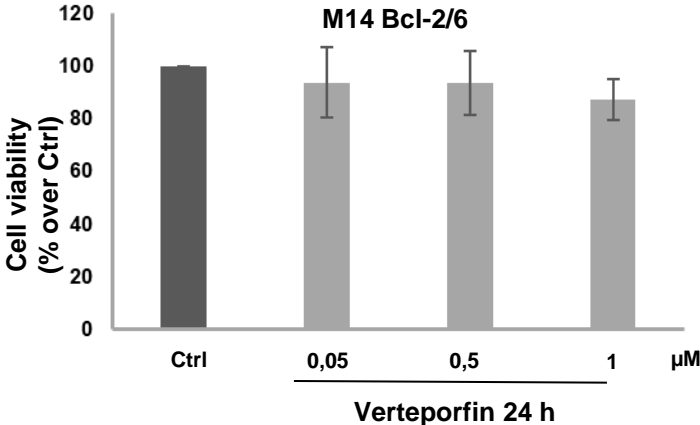

# Supplementary Figure S5

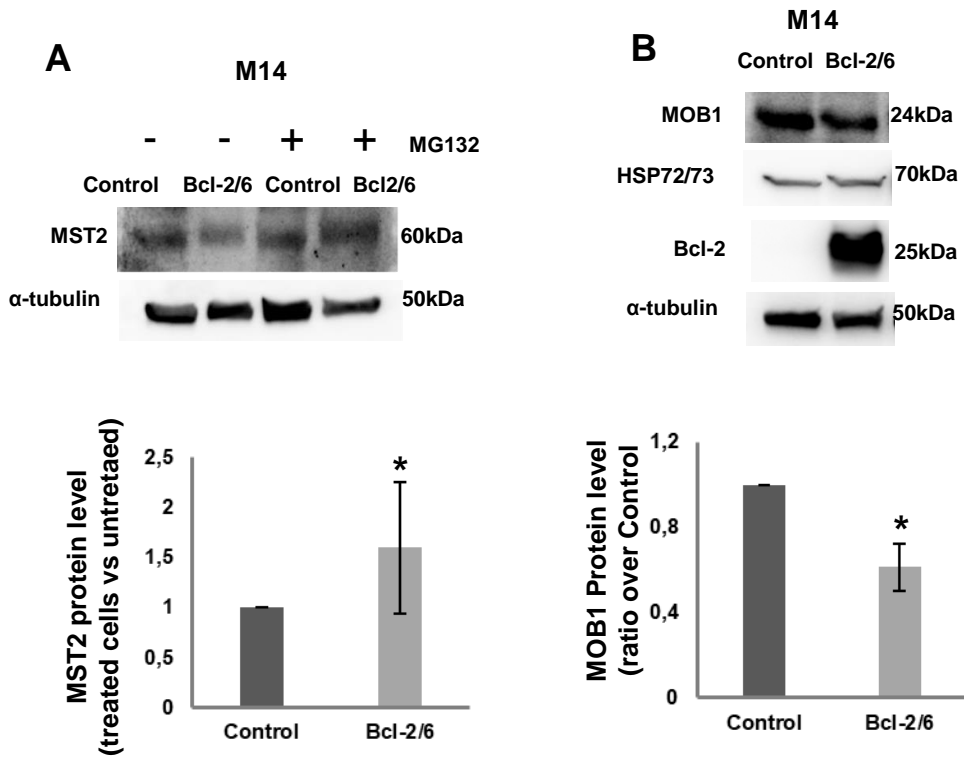

# Supplementary Figure S6

**A**

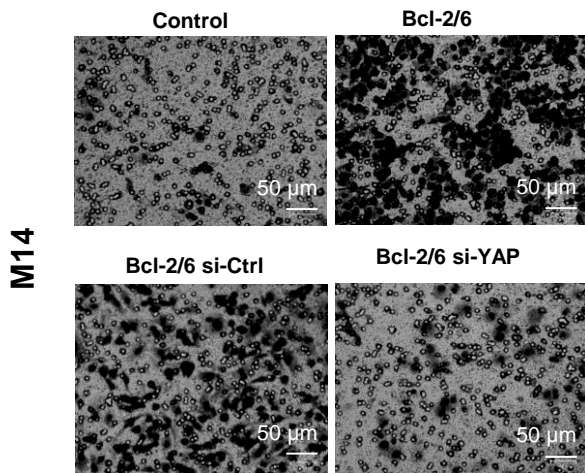

**B**

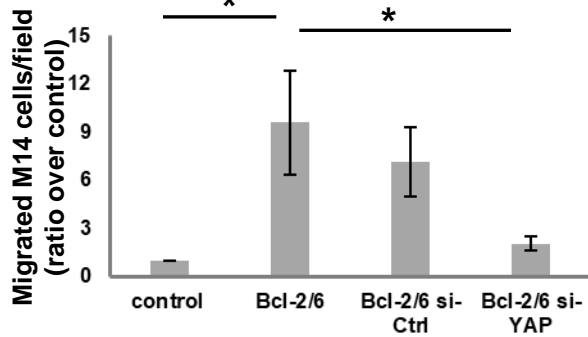

**C**

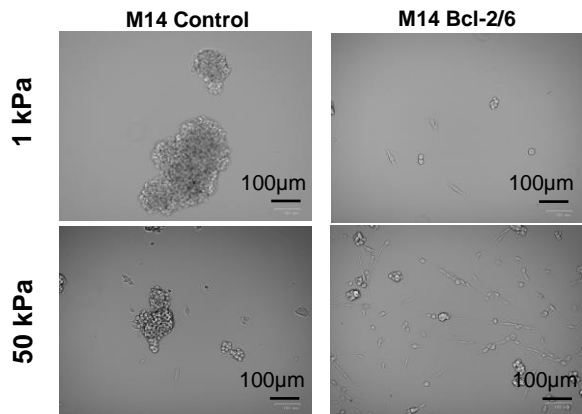

**D**

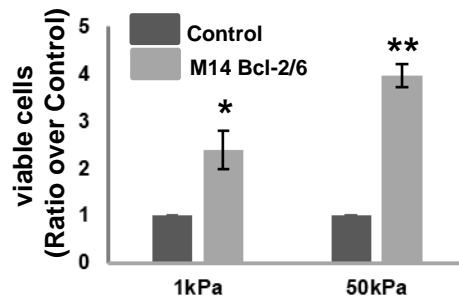

**E**

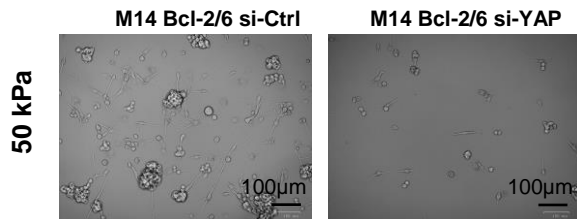

**F**

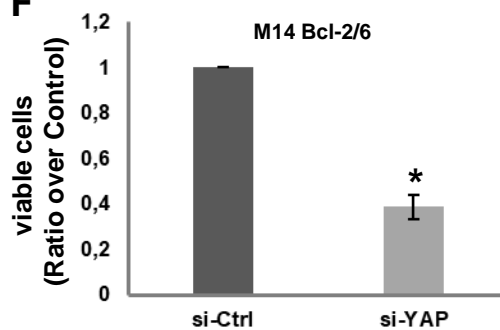

Supplement: 12964_2024_1647_MOESM2_ESM.pdf [file 12964_2024_1647_MOESM2_ESM.pdf]
