# Supplementary material for: Bcl-2 dependent modulation of Hippo pathway in cancer cells
Source: PubMed Central journal article supplement (PMC11097437; doi:10.1186/s12964-024-01647-1), 2024-05-16

Fig.2B

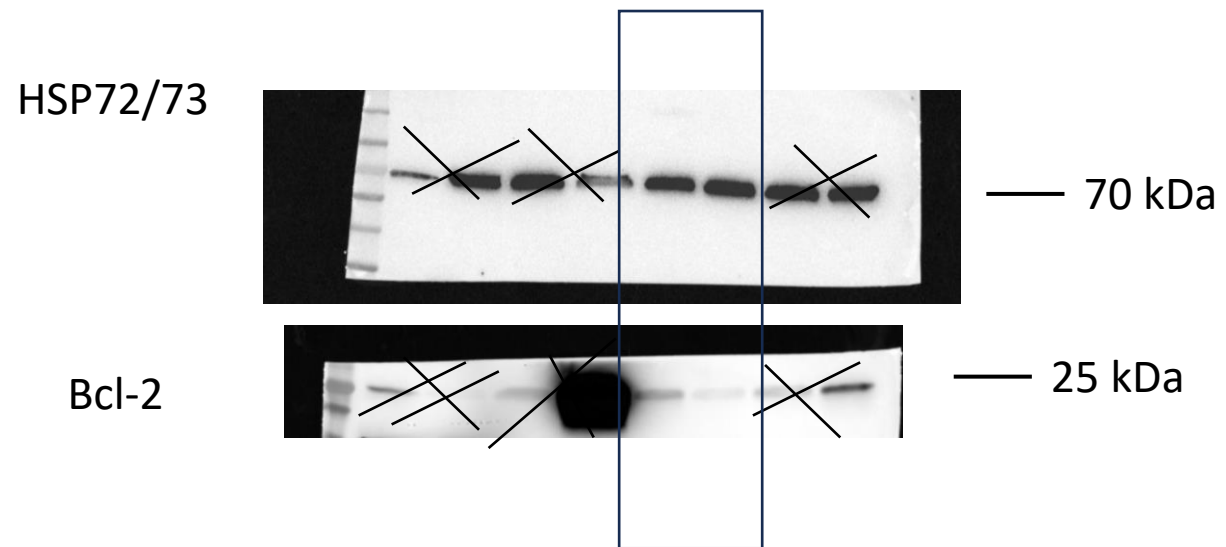

Fig.3D

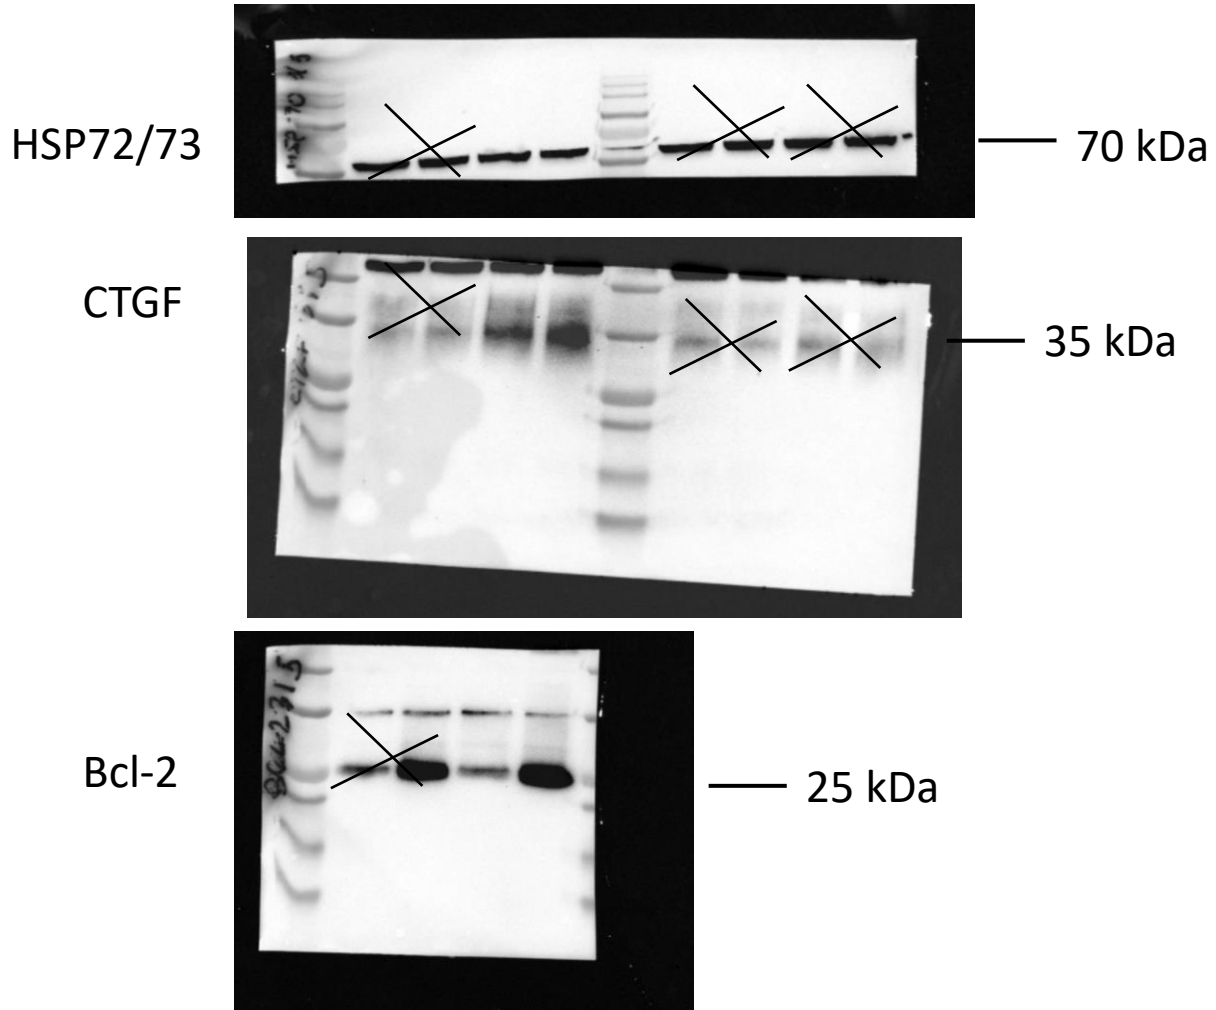

Fig.3F

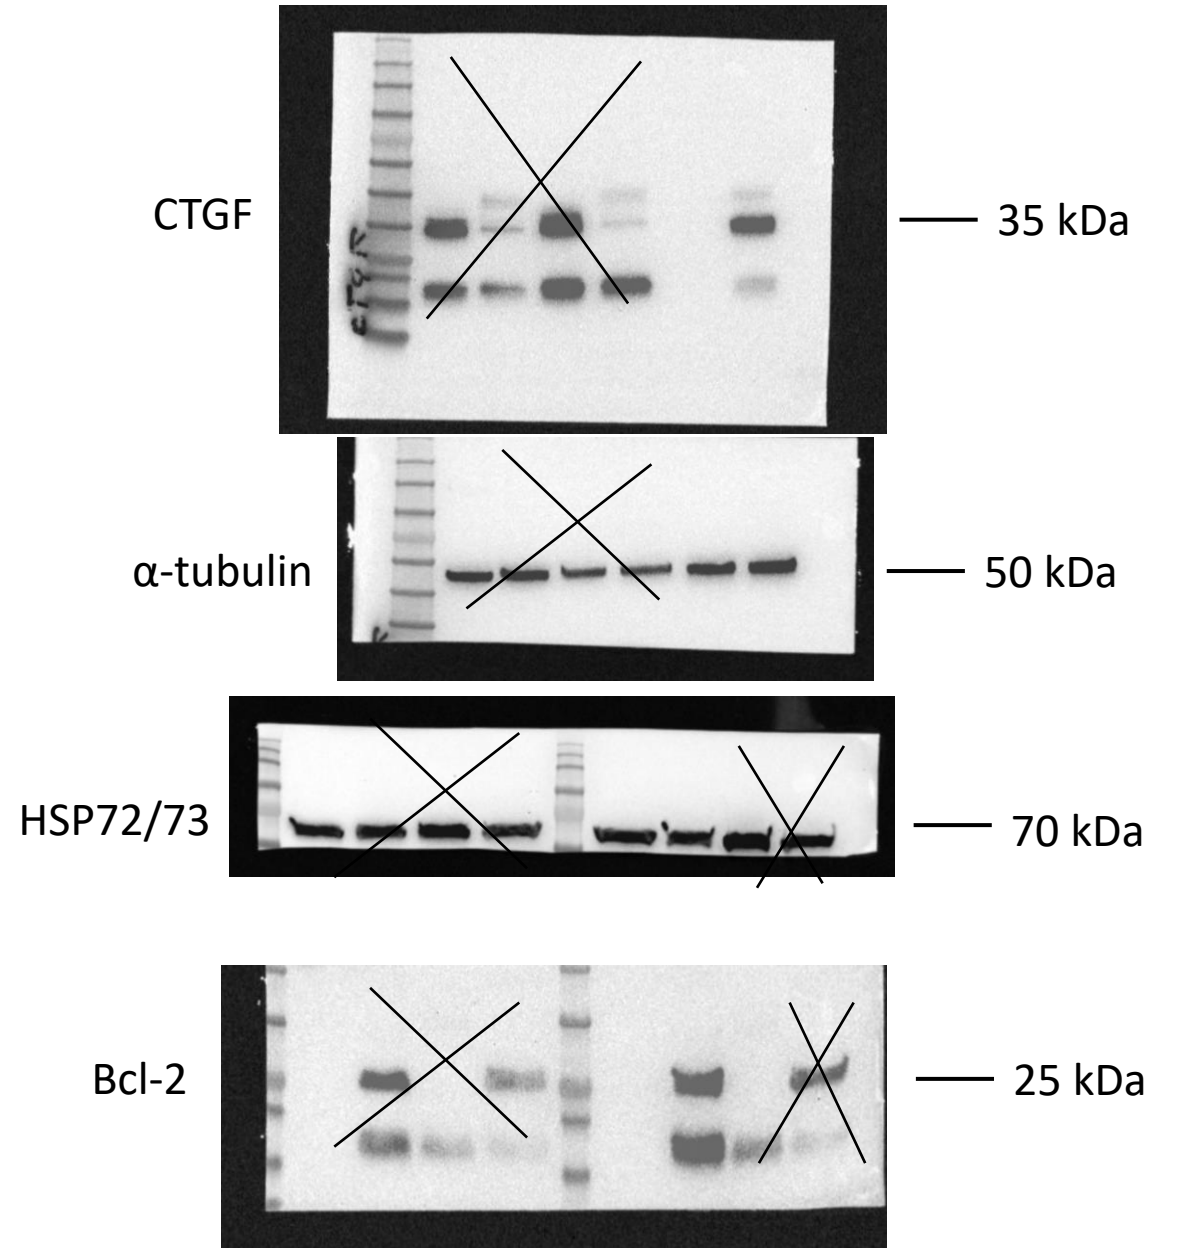

Fig.3H

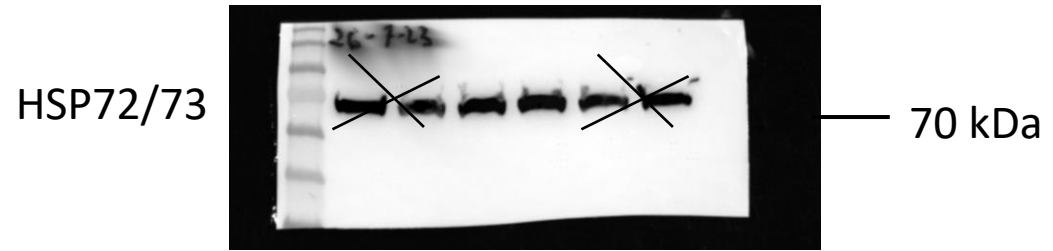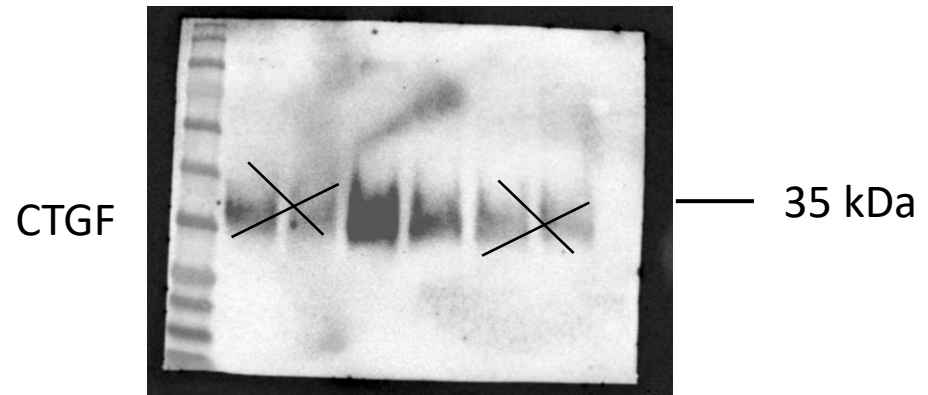

Fig.4A

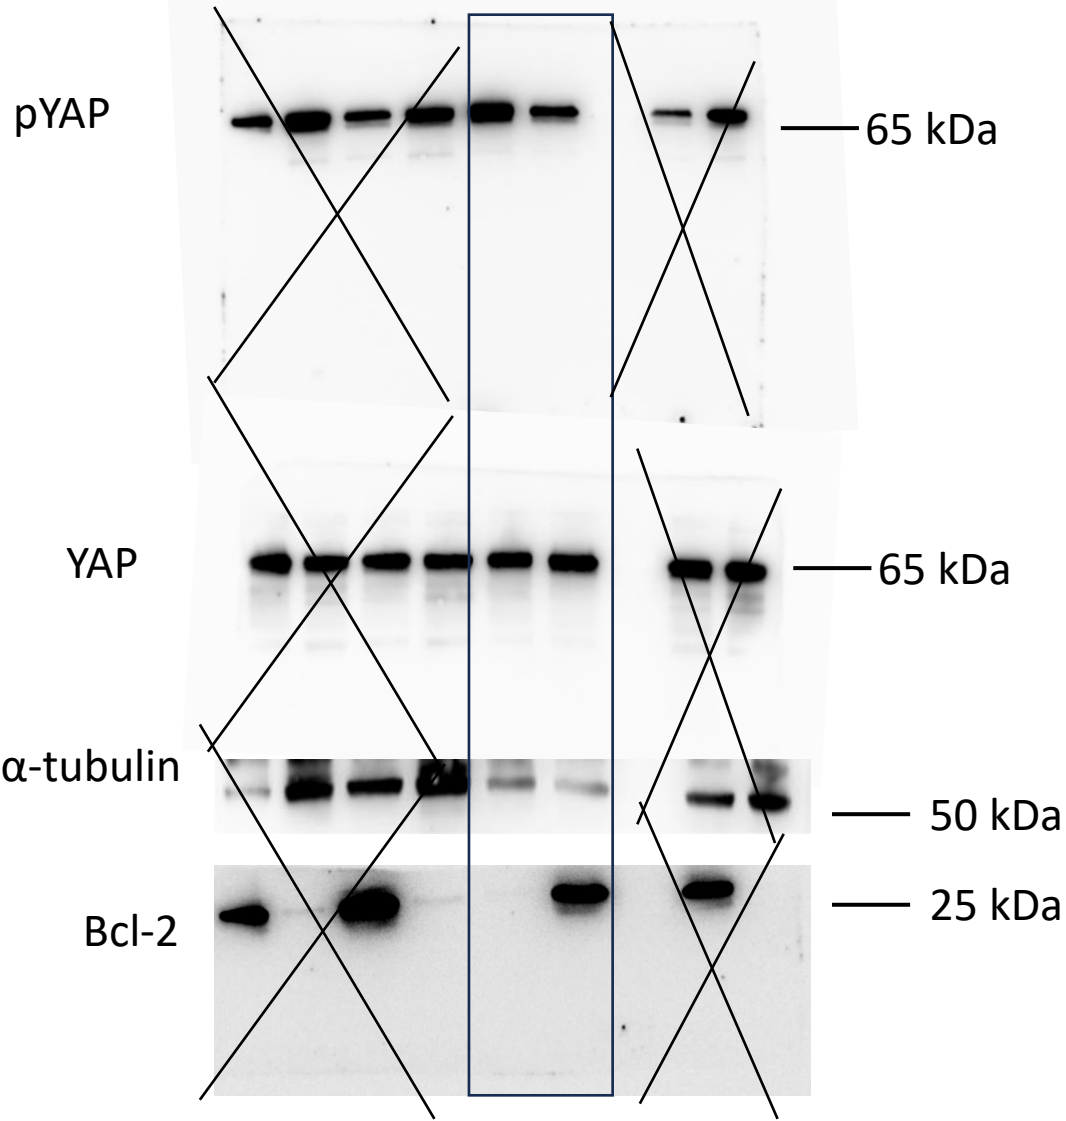

Fig.4B

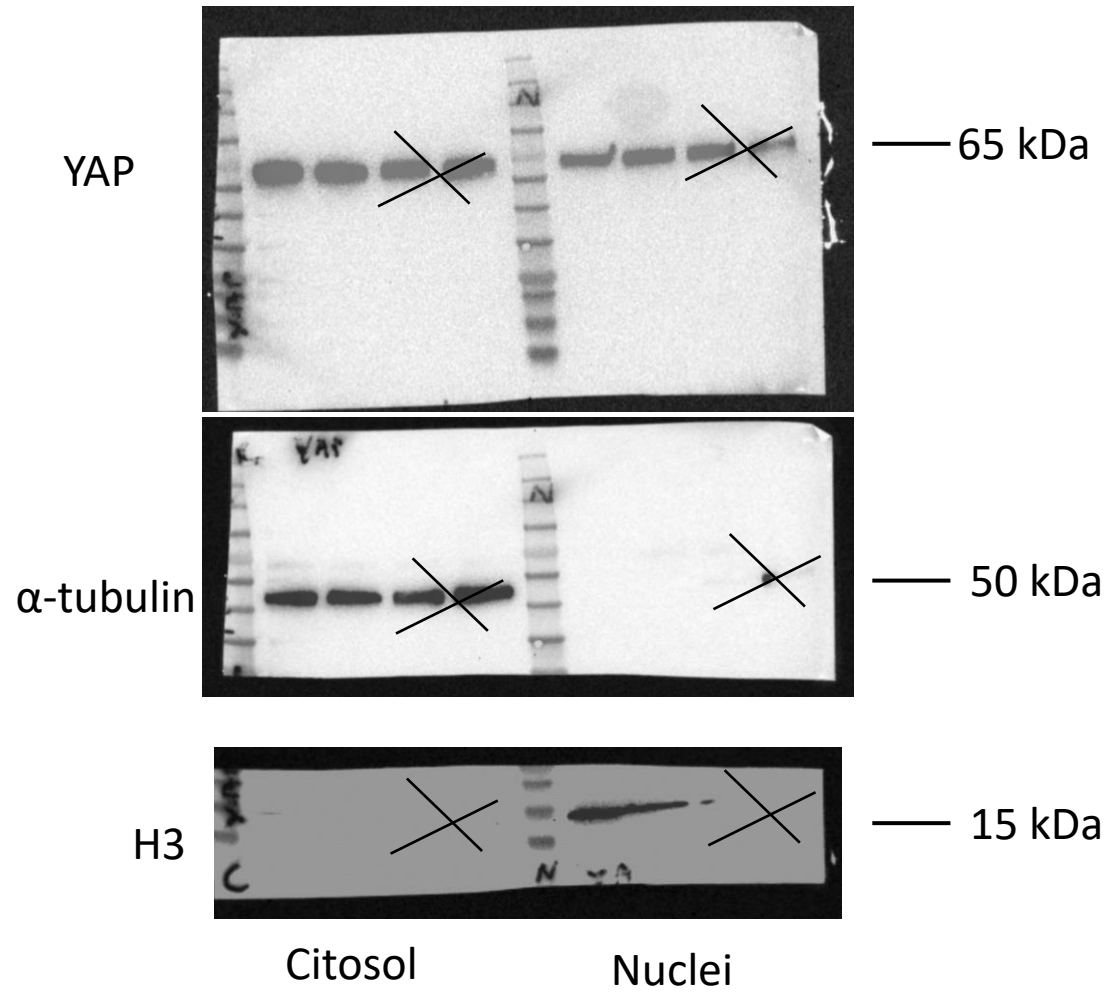

Fig.4C

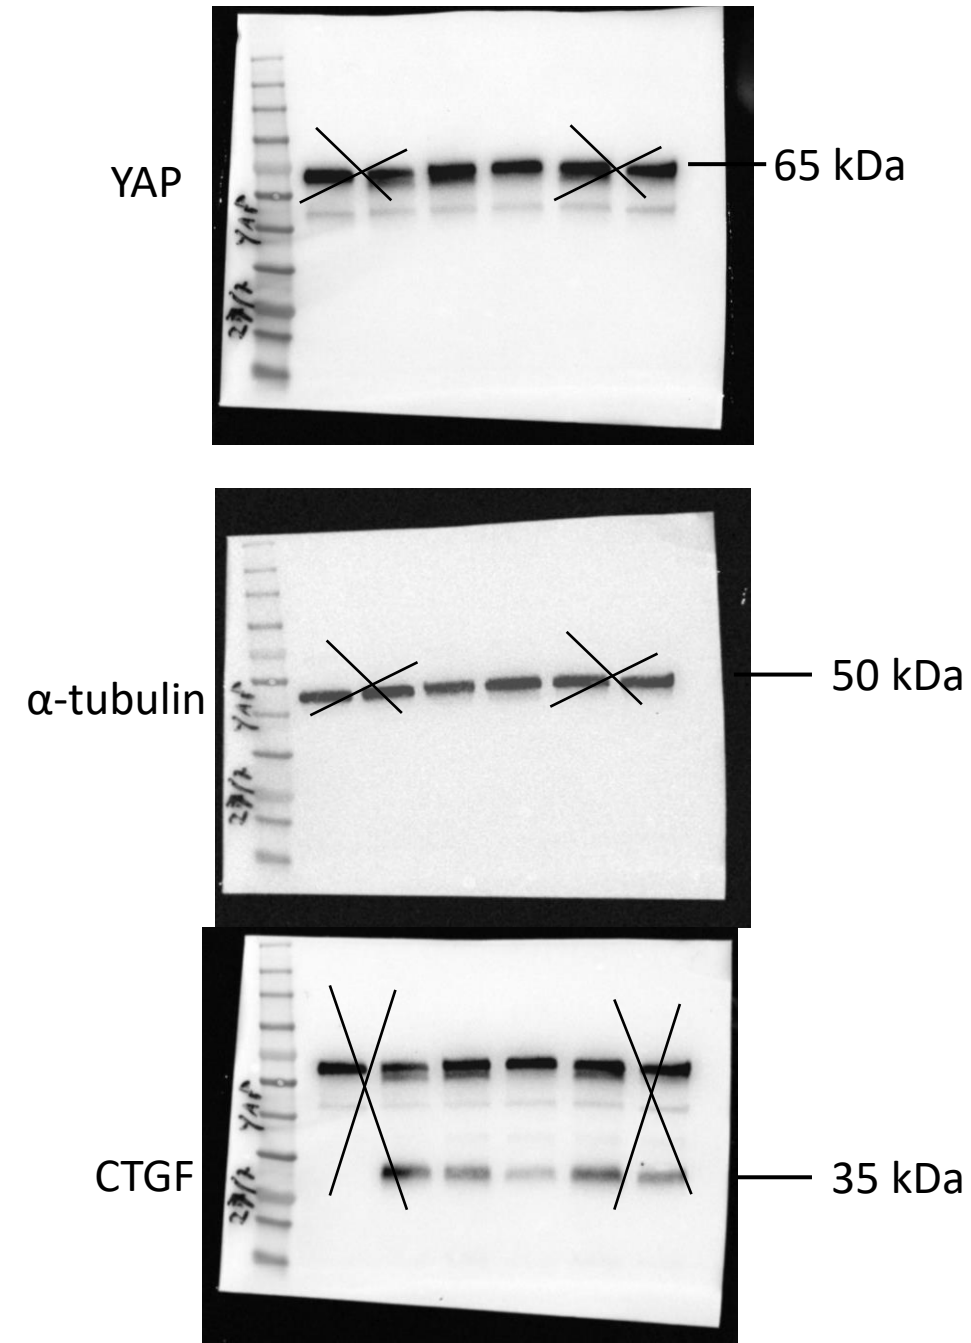

Fig.4E

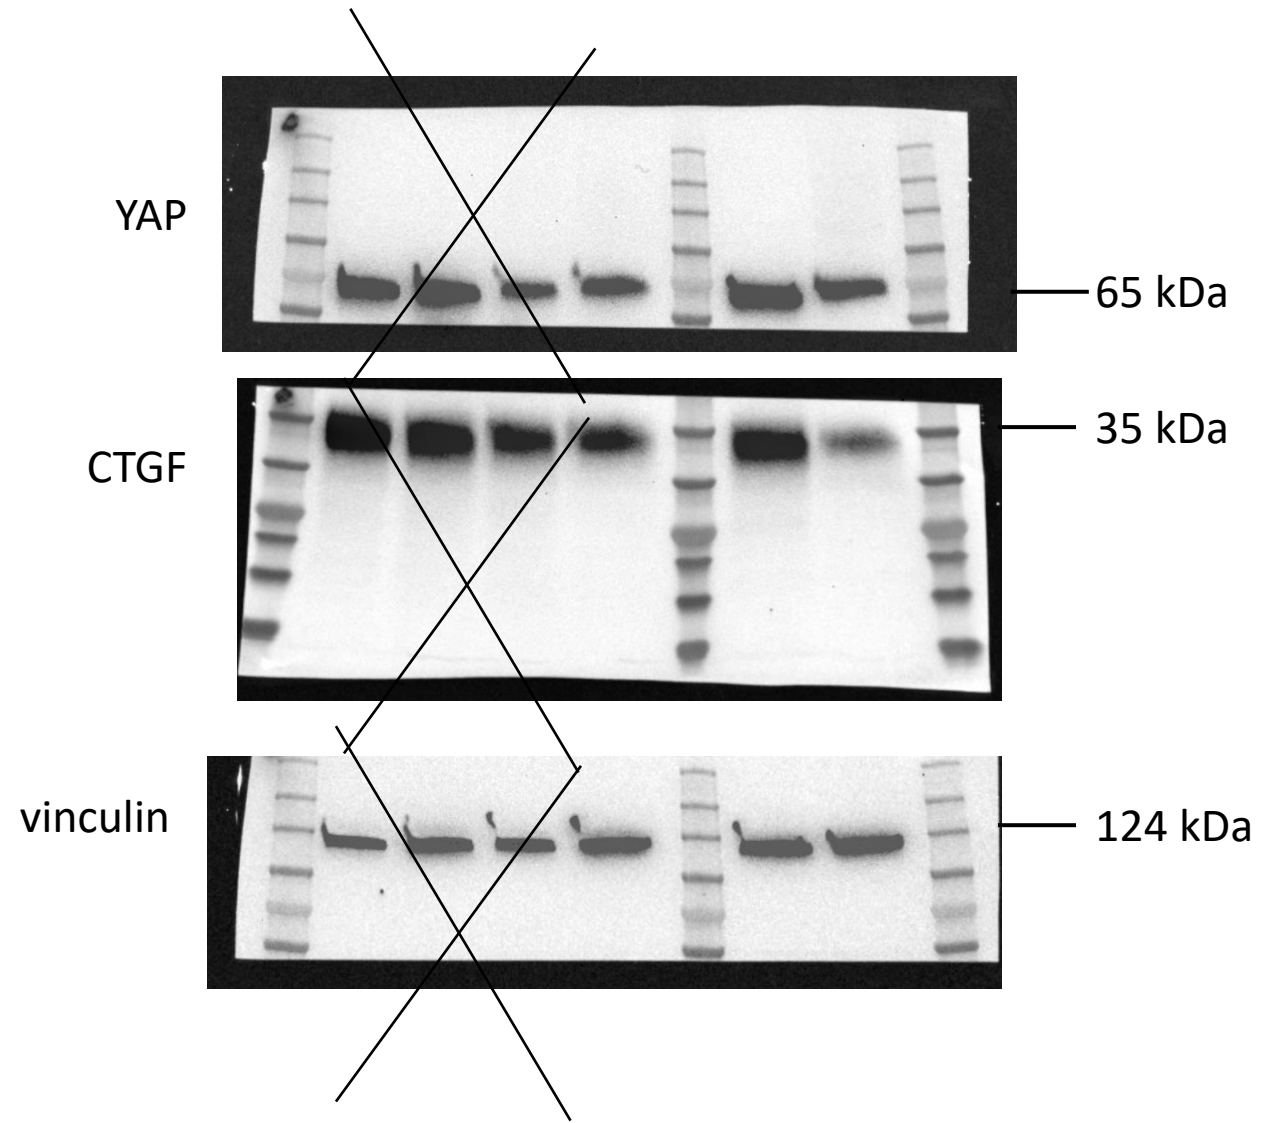

Fig.5A

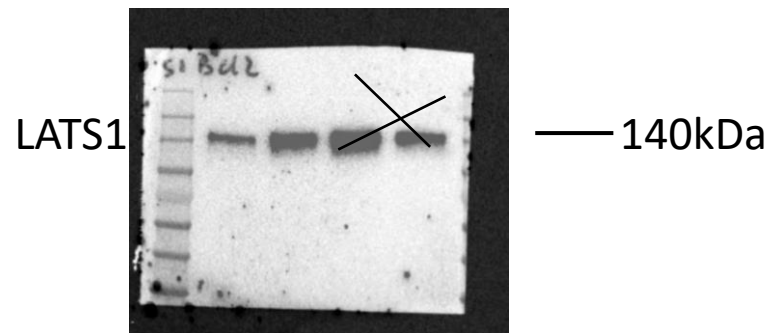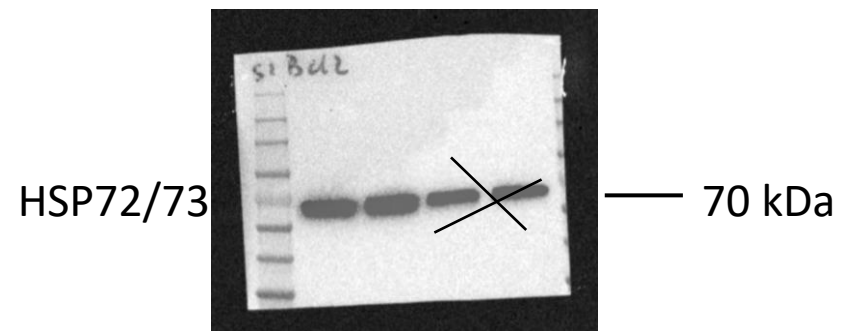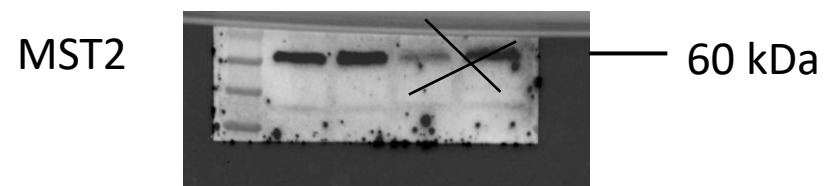

Fig.5B

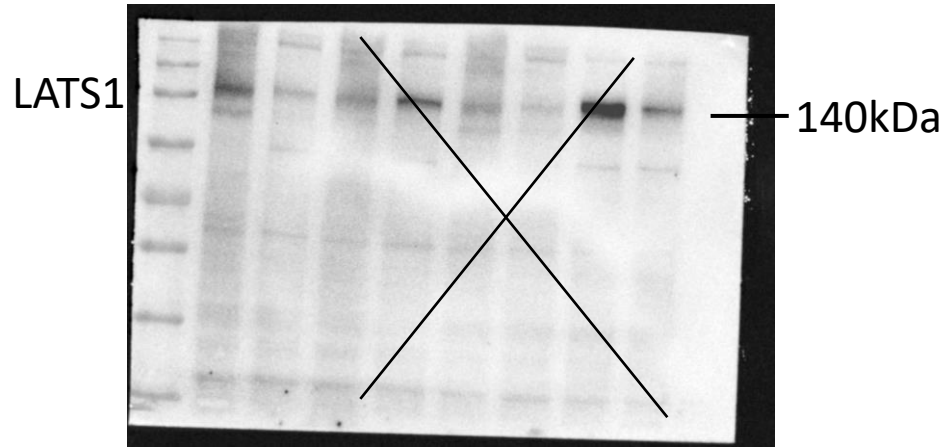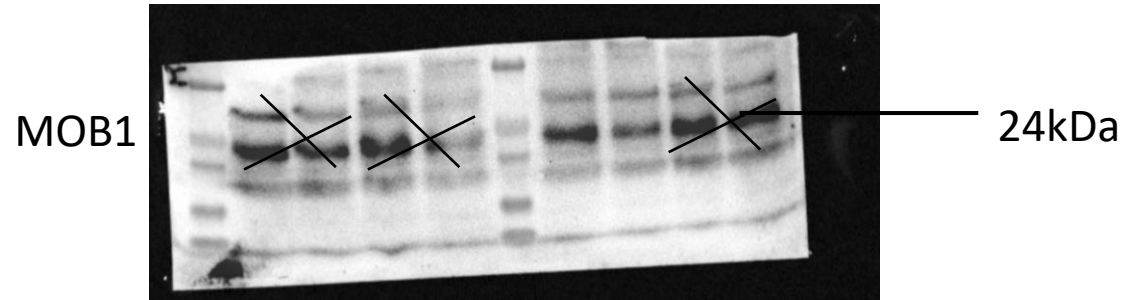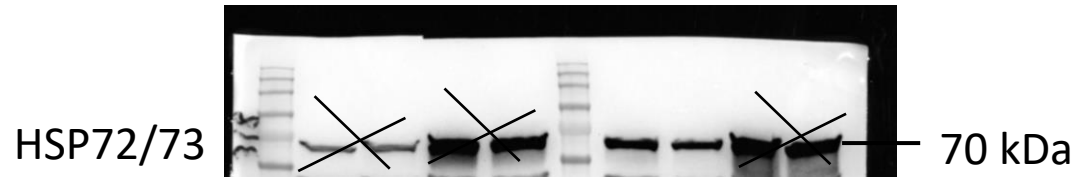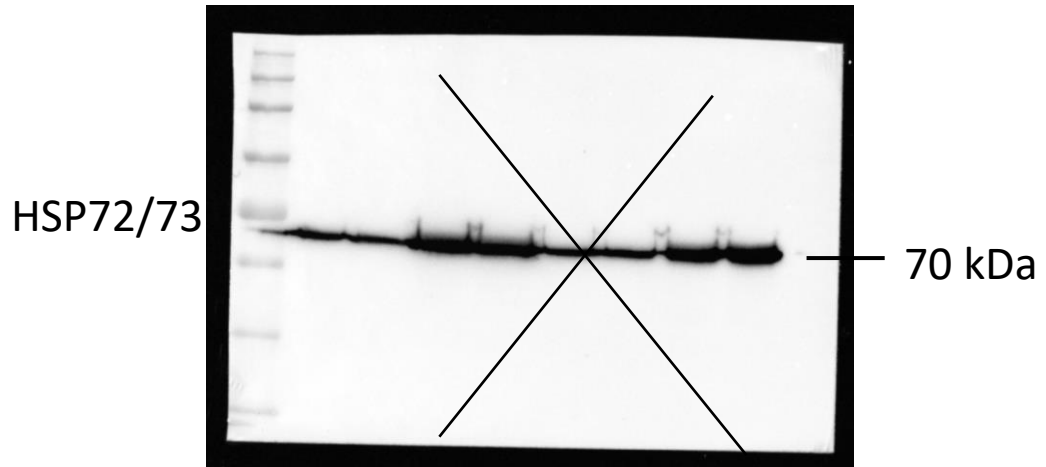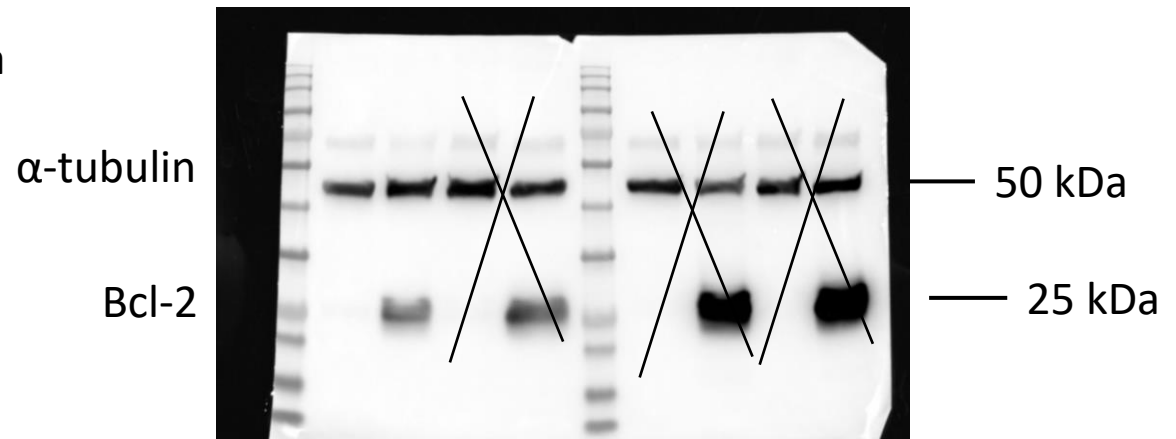



Fig.5C

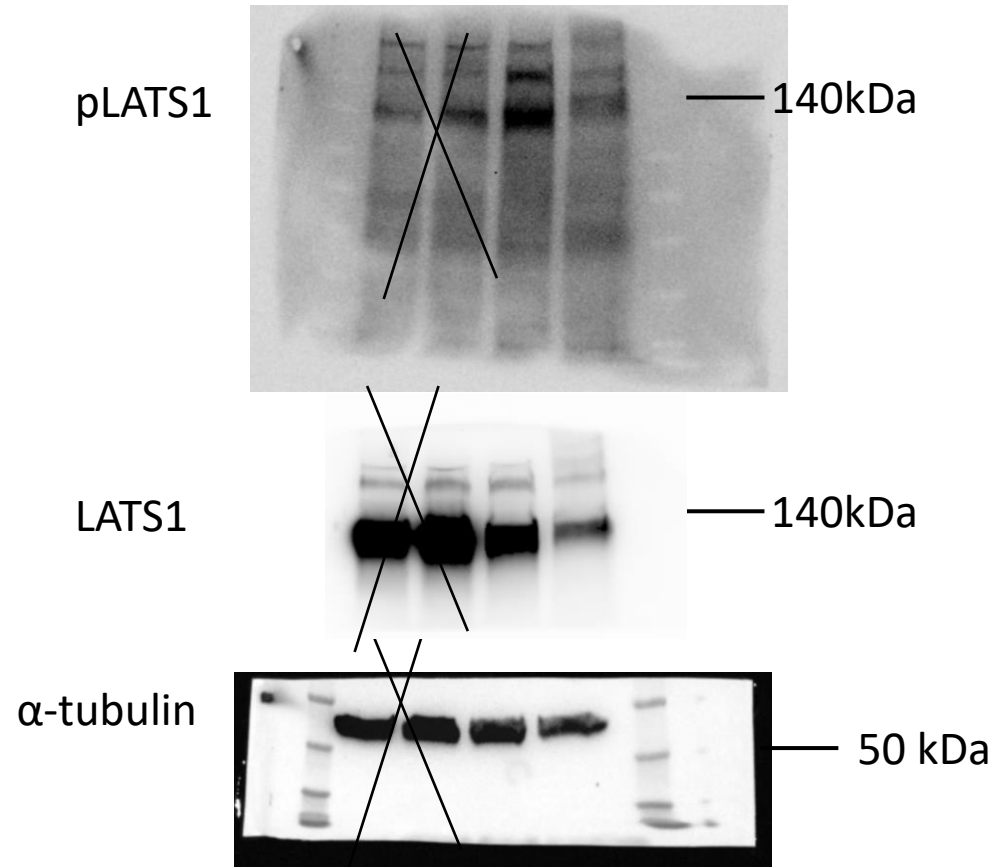

Fig.5D

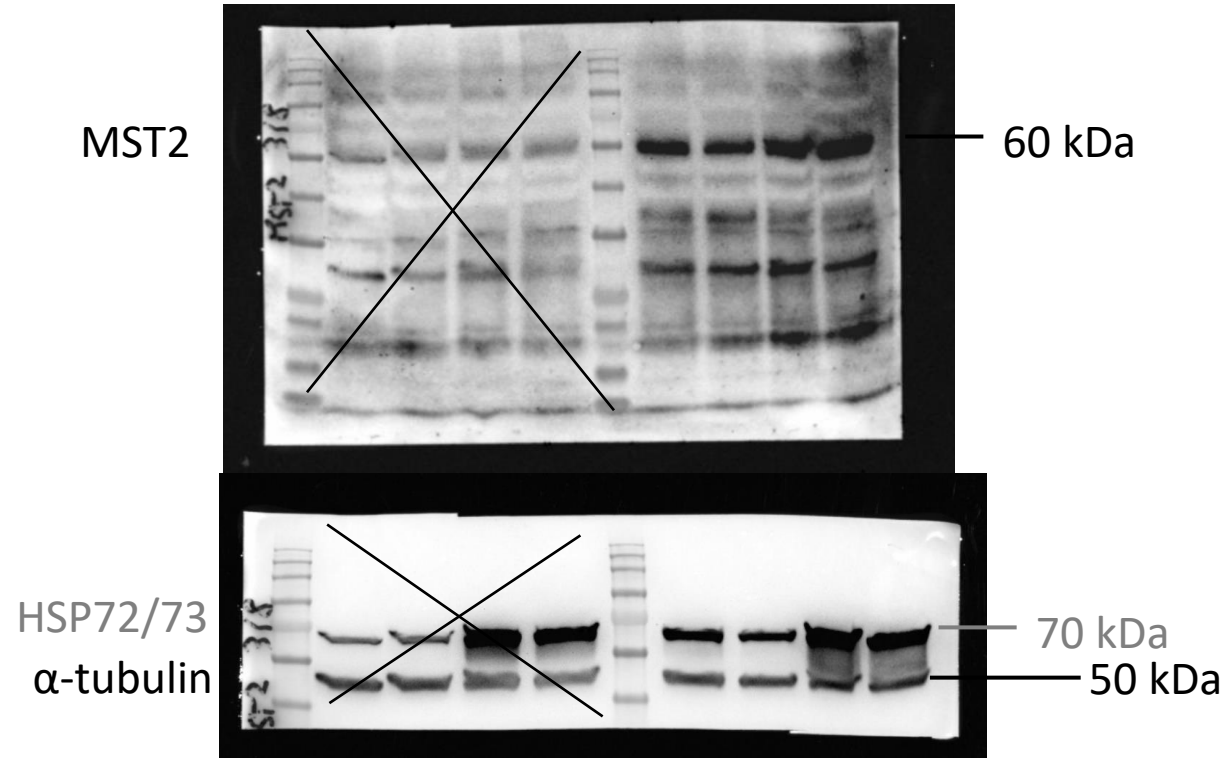

Fig.5E

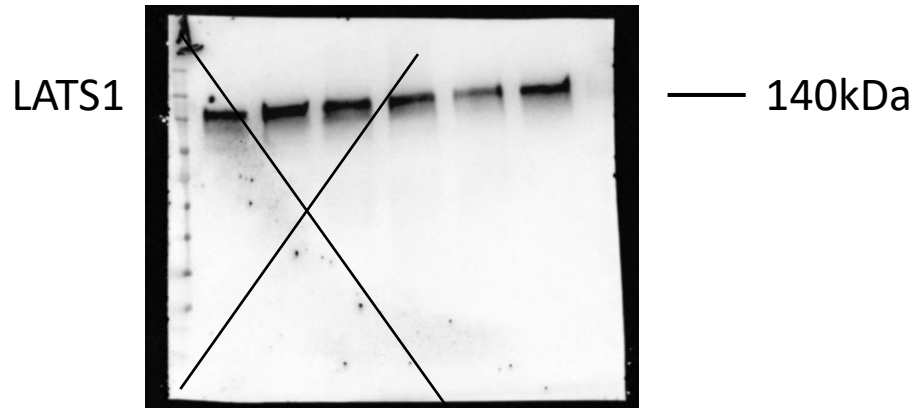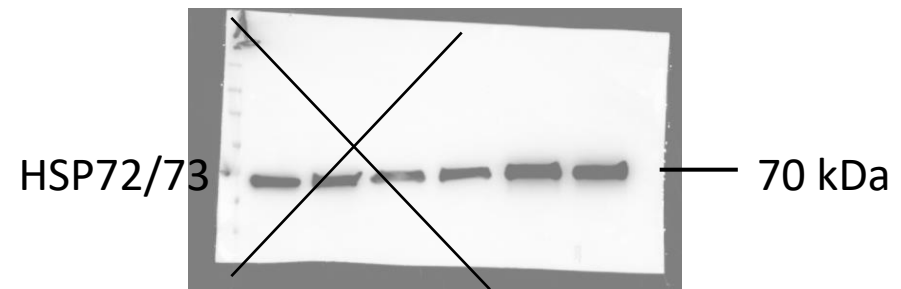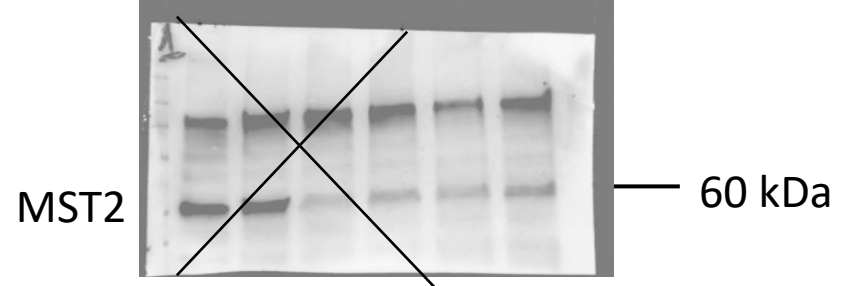

Fig.5F

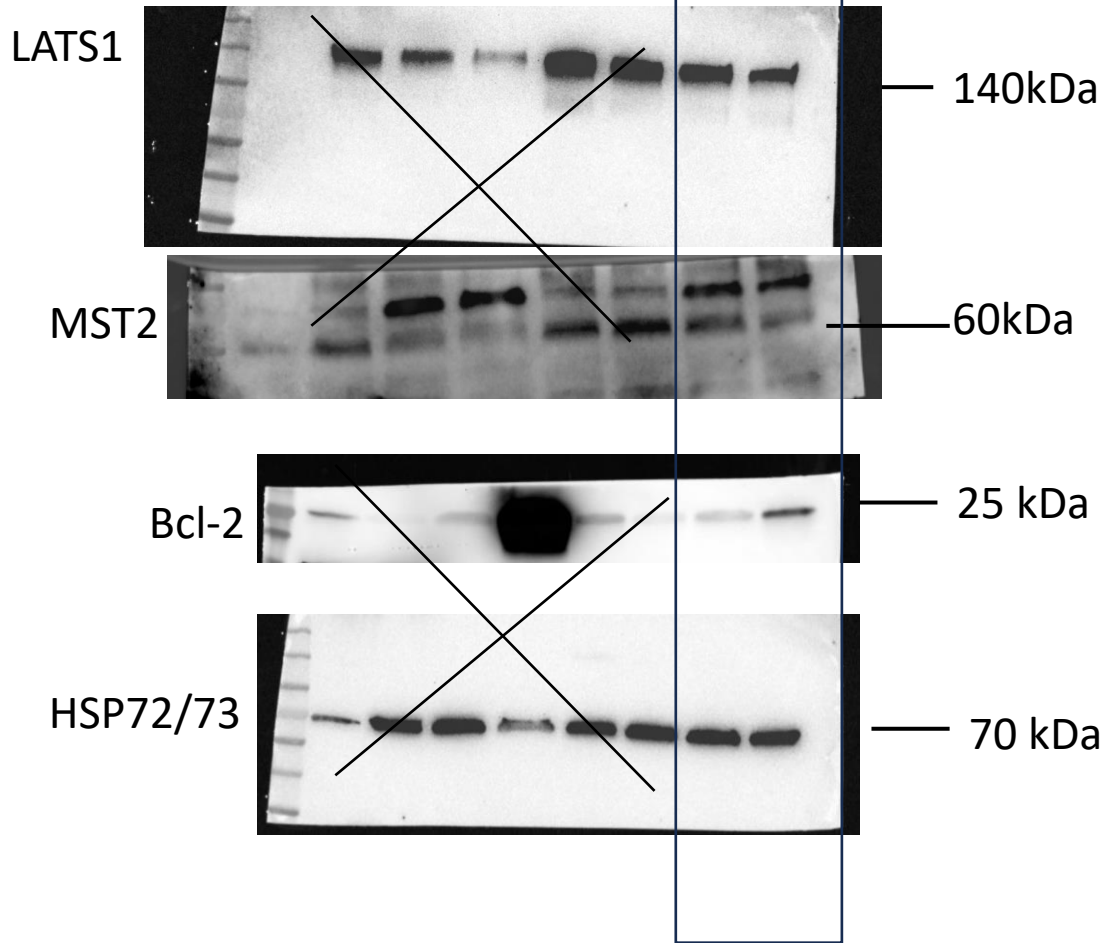

Fig.8C

$\alpha$ -SMA

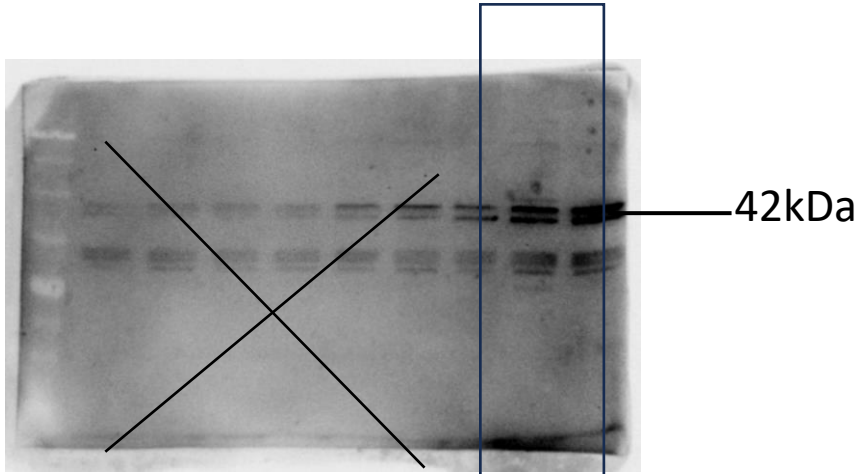

HSP72/73

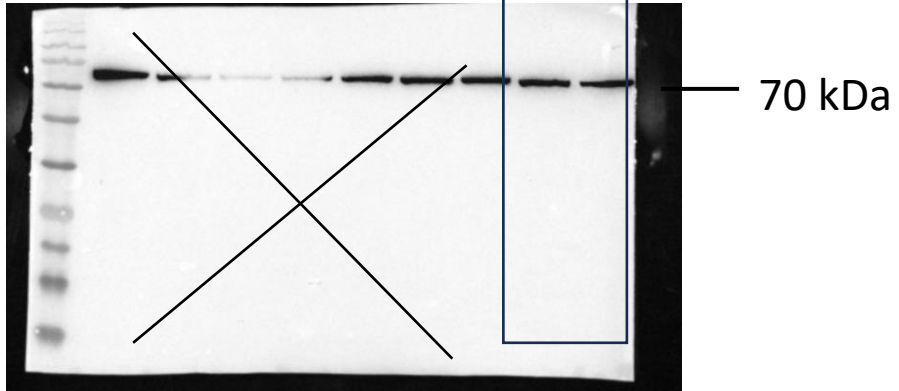

pERK1/2

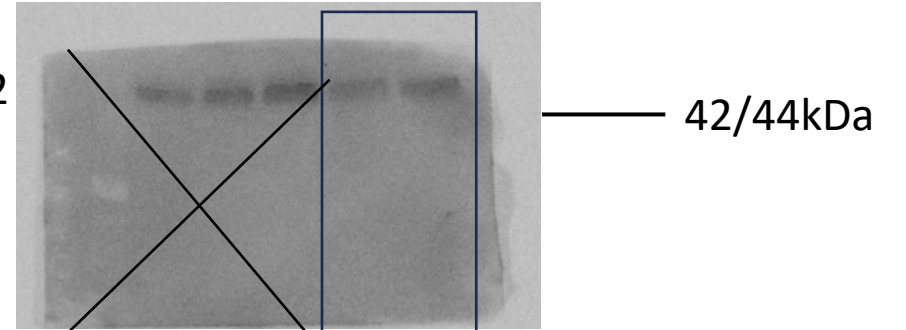

ERK1/2

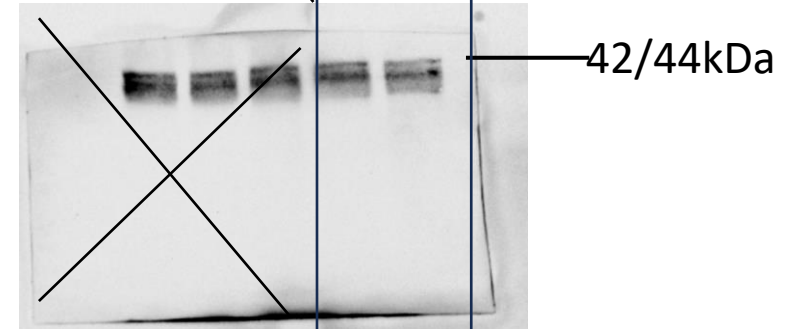

HSP72/73

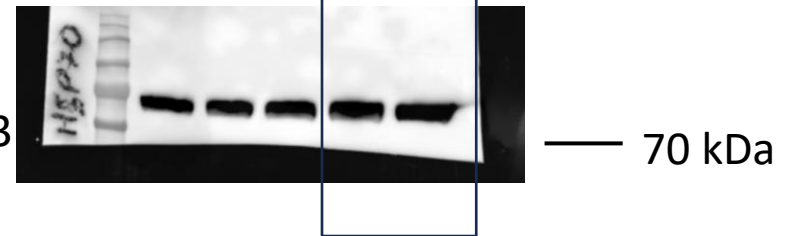

Fig.9B

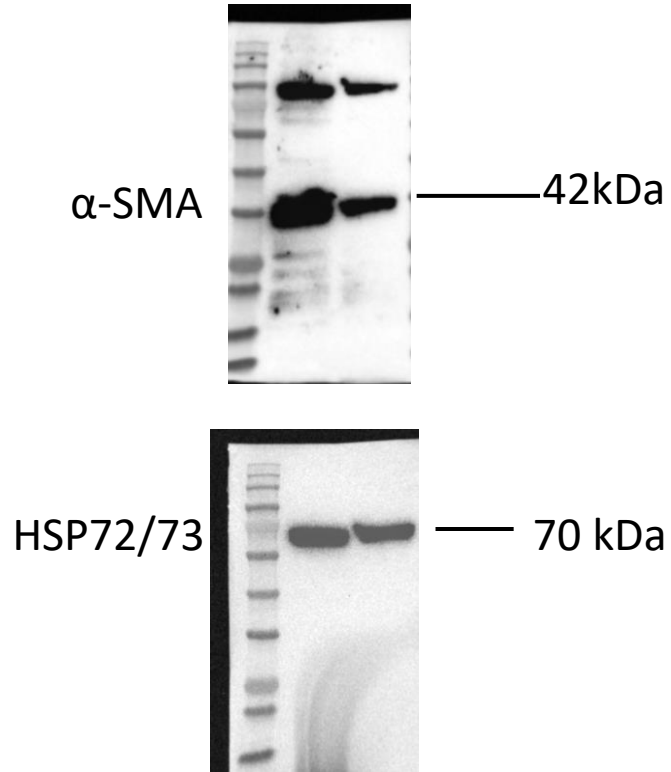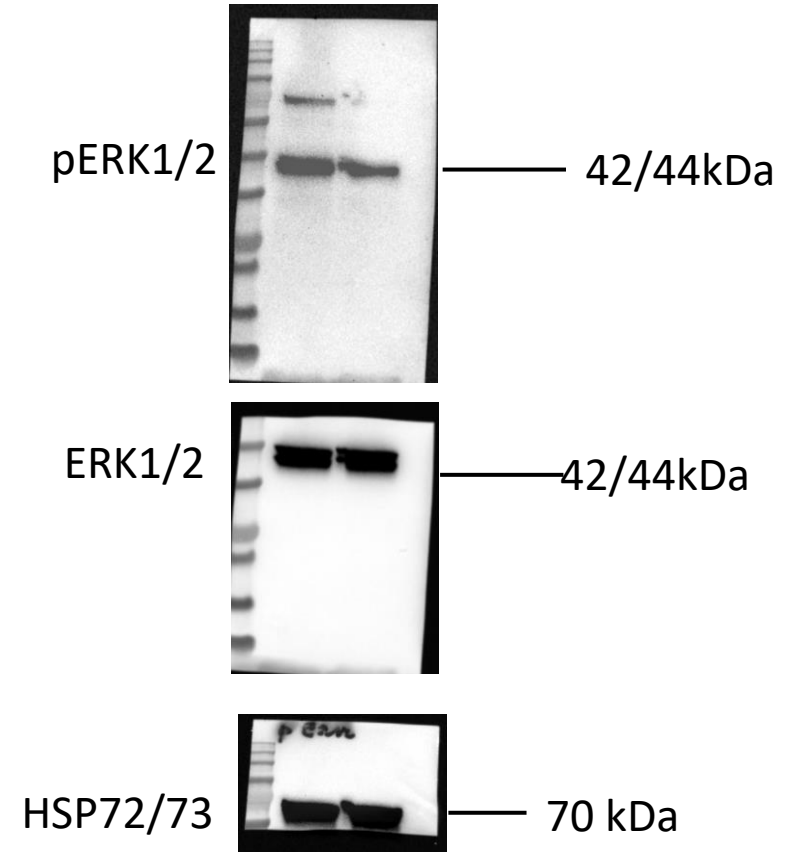

Supplementary Figure 1A

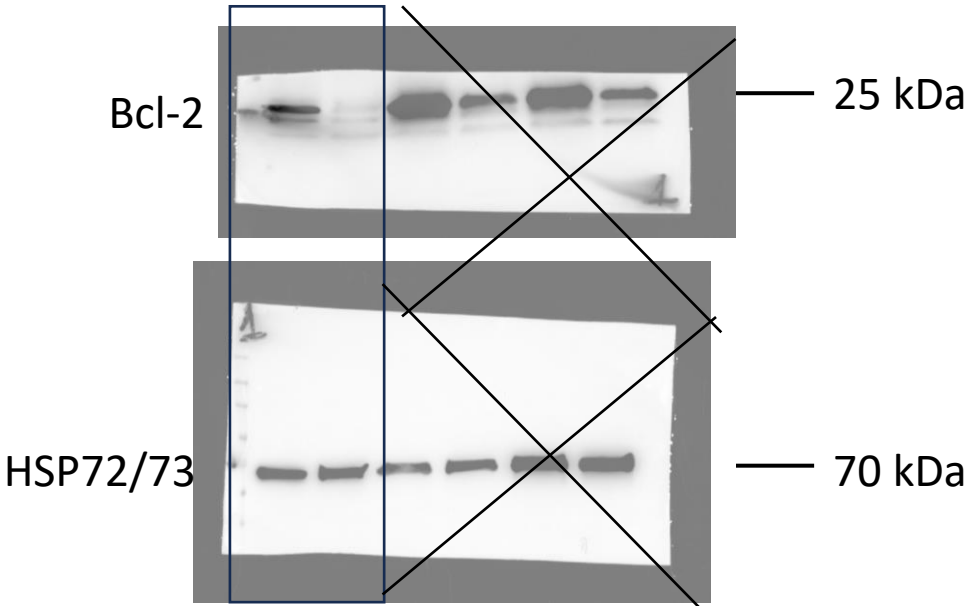

Supplementary Figure 1C

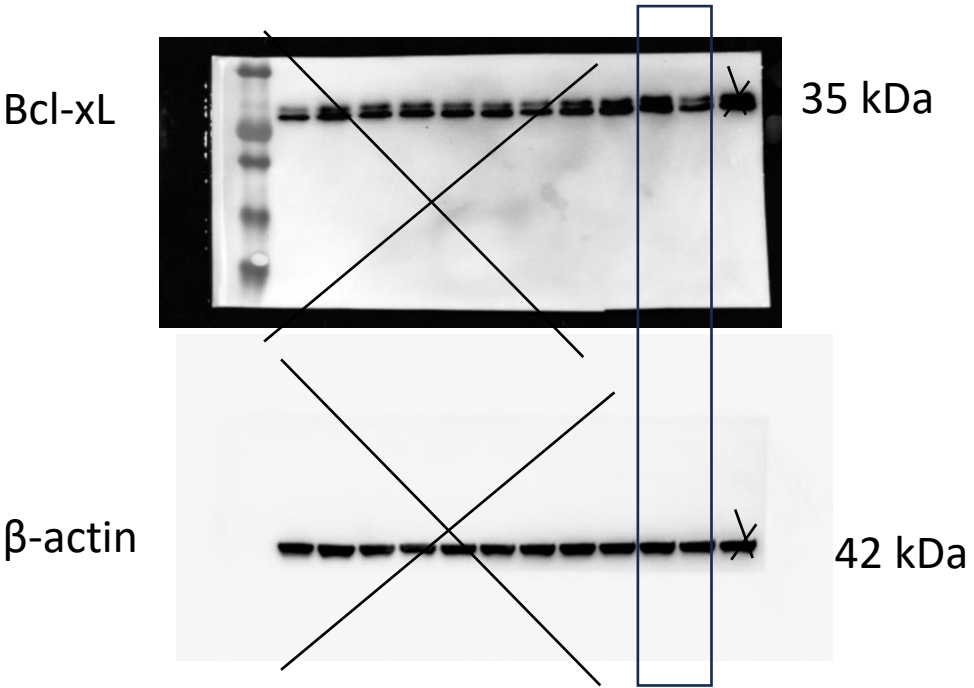

# Supplementary Figure 3A

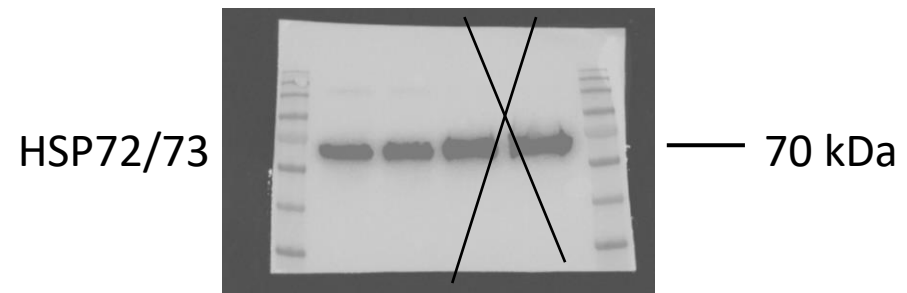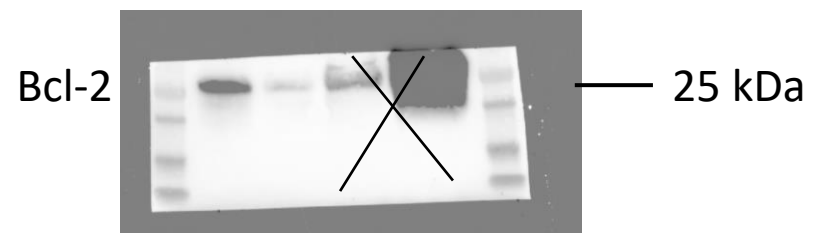



Supplementary Figure 4B

Supplementary Figure 4A

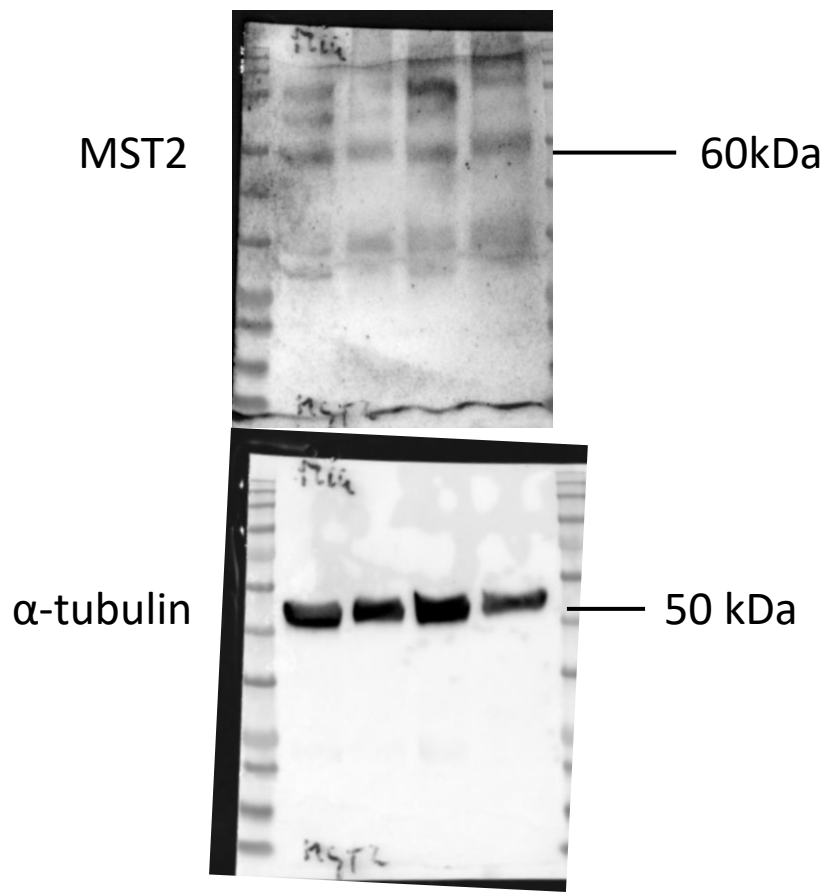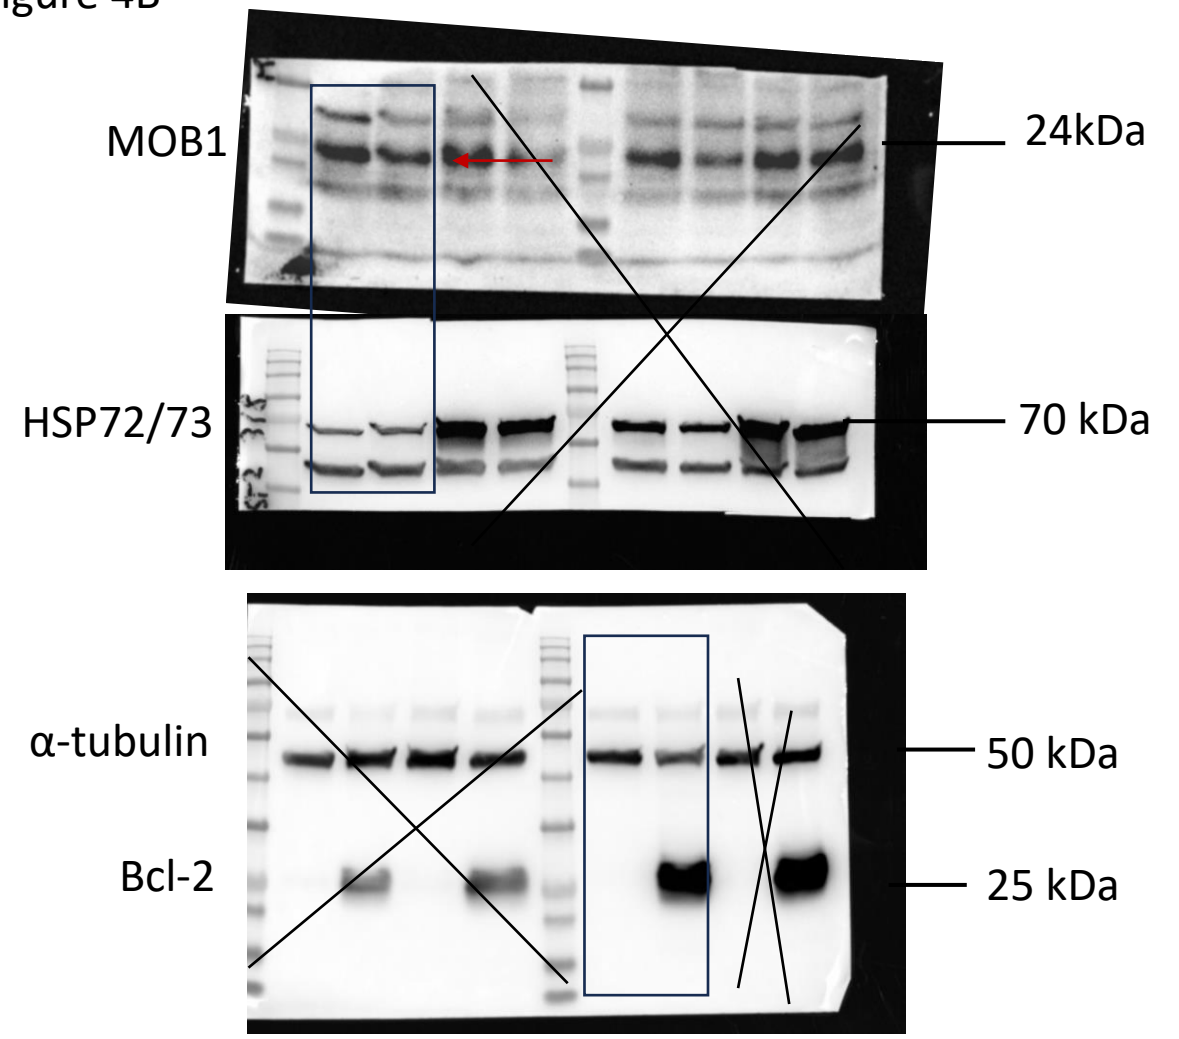

Supplement: 12964_2024_1647_MOESM6_ESM.pdf [file 12964_2024_1647_MOESM6_ESM.pdf]
